# Supplementary material for: A rapid variant-tolerant reverse transcription loop-mediated isothermal amplification assay for the point of care detection of HIV-1
Source: Royal Society of Chemistry journal article supplement (doi:10.1039/d1an00598g), 2021-01-01
Supplement: d1an00598g1.pdf [file d1an00598g1.pdf]

## Supplementary Information

### A Rapid Variant-Tolerant Reverse Transcription Loop-Mediated Isothermal Amplification Assay for Point of Care Detection of HIV-1

Yingxue Li,<sup>a, b, c, ‡</sup> Xin Chen,<sup>d, ‡</sup> Yongjuan Zhao,<sup>a, ‡</sup> Zhenzhou Wan,<sup>e</sup> Yi Zeng,<sup>a</sup>  
Yingying Ma,<sup>a</sup> Lianqun Zhou,<sup>b, c</sup> Gaolian Xu,<sup>f</sup> Julien Reboud,<sup>g</sup> Jonathan M. Cooper,<sup>g</sup>  
Chiyu Zhang<sup>a, \*</sup>

#### Affiliations:

<sup>a</sup> Shanghai Clinical Research Center for Infectious Disease (HIV/AIDS), Shanghai Public Health Clinical Center, Fudan University, Shanghai 201508, China

<sup>b</sup> CAS key Laboratory of Bio-medical Diagnostics, Suzhou Institute of Biomedical Engineering and Technology, Chinese Academy of Sciences, Suzhou 215163, China

<sup>c</sup> School of Biomedical Engineering, University of Science and Technology of China, Hefei 260026, China

<sup>d</sup> Department of Pathogenic Biology, School of Basic Medical Sciences, Gannan Medical University, Ganzhou 341000, China

<sup>e</sup> Medical Laboratory of Taizhou Fourth People's Hospital, Taizhou 225300 China.

<sup>f</sup> Nano Biomedical Research Centre, School of Biomedical Engineering, Shanghai Jiao Tong University, Shanghai 200030, China

<sup>g</sup> Division of Biomedical Engineering, University of Glasgow, G12 8LT Glasgow, United Kingdom

<sup>‡</sup> These authors contributed equally to this work.

#### \* Corresponding authors:

Chiyu Zhang, Shanghai Public Health Clinical Center, Fudan University, Shanghai 201508, China.

Email: [zhangcy1999@shphc.org.cn](mailto:zhangcy1999@shphc.org.cn)

**Table S1. Primers and probes used in the study.**

| Aim                 | Primers                | Sequence (5'-3')                                  | Ref.       |                         |                                 |
|---------------------|------------------------|---------------------------------------------------|------------|-------------------------|---------------------------------|
| Mutant construction | F3-Mu-A(F)             | CACTTTGGAAAGGACCAGAAAAGCTCCTCT                    | This study |                         |                                 |
|                     | F3-Mu-A(R)             | TTGGTCCTTTCCAAAGTGGATTTCTGCTGT                    |            |                         |                                 |
|                     | F3-Mu-G(F)             | CACTTTGGAAAGGACCAGGAAAGCTCCTCT                    |            |                         |                                 |
|                     | F3-Mu-G(R)             | CTGGTCCTTTCCAAAGTGGATTTCTGCTGT                    |            |                         |                                 |
|                     | F1-Mu-A(F)             | GGGGCAGTAGTAATACAAAATAATAGTGAC                    |            |                         |                                 |
|                     | F1-Mu-A(R)             | TTTGTATTACTACTGCCCTTCACCTTTCC                     |            |                         |                                 |
|                     | F1-Mu-C(F)             | GGGGCAGTAGTAATACAAATAATAGTGAC                     |            |                         |                                 |
|                     | F1-Mu-C(R)             | CTTGTATTACTACTGCCCTTCACCTTTCC                     |            |                         |                                 |
|                     | LB-Mu-A(F)             | ATGATTGTGTGGCAAGTAACAGGATGAGG                     |            |                         |                                 |
|                     | LB-Mu-A(R)             | TTACTTGCCACACAATCATCACCTGCCATC                    |            |                         |                                 |
|                     | LB-Mu-C(F)             | ATGATTGTGTGGCAAGTACACAGGATGAGG                    |            |                         |                                 |
|                     | LB-Mu-C(R)             | GTACTIONGCCACACAATCATCACCTGCCATC                  |            |                         |                                 |
|                     | FIP-Mu-A(F)            | AAGCTCCTCTGGAAAGGTAAGGGGGCAGTA                    |            |                         |                                 |
|                     | FIP-Mu-A(R)            | CCTTTCCAGAGGAGCTTTGCTGGTCCTTTT                    |            |                         |                                 |
|                     | FIP-Mu-C(F)            | AAGCTCCTCTGGAAAGGCAAGGGGGCAGTA                    |            |                         |                                 |
|                     | FIP-Mu-C(R)            | CCTTTCCAGAGGAGCTTTGCTGGTCCTTTG                    |            |                         |                                 |
|                     | FIP-Mu-2G(F)           | AAAGCTCCTCTGGAAAGGGGAAGGGGGCAGT                   |            |                         |                                 |
|                     | FIP-Mu-2G(R)           | CCCTTTCCAGAGGAGCTTTGCTGGTCCTTT                    |            |                         |                                 |
|                     | FIP-Mu-2C(F)           | AAAGCTCCTCTGGAAAGGCGAAGGGGGCAGT                   |            |                         |                                 |
|                     | FIP-Mu-2C(R)           | GCCTTTCCAGAGGAGCTTTGCTGGTCCTTT                    |            |                         |                                 |
|                     | FIP-Mu-3A(F)           | CAAAGCTCCTCTGGAAAGATGAAGGGGGCAG                   |            |                         |                                 |
|                     | FIP-Mu-3A(R)           | TCTTTCCAGAGGAGCTTTGCTGGTCCTTTT                    |            |                         |                                 |
|                     | FIP-Mu-3C(F)           | CAAAGCTCCTCTGGAAAGCTGAAGGGGGCAG                   |            |                         |                                 |
|                     | FIP-Mu-3C(R)           | GCTTTCCAGAGGAGCTTTGCTGGTCCTTTT                    |            |                         |                                 |
|                     | FIP-Mu-5T(F)           | AGCAAAGCTCCTCTGGAATGGTGAAGGGGC                    |            |                         |                                 |
|                     | FIP-Mu-5T(R)           | ATTCCAGAGGAGCTTTGCTGGTCCTTTCCA                    |            |                         |                                 |
|                     | FIP-Mu-5G(F)           | AGCAAAGCTCCTCTGGAAGGGTGAAGGGGC                    |            |                         |                                 |
|                     | FIP-Mu-5G(R)           | CTTCCAGAGGAGCTTTGCTGGTCCTTTCCA                    |            |                         |                                 |
|                     | RT-LAMP assay of HIV-1 | AceIN-F3                                          |            | CCMMTTTGGAAAGGACCAGC    | (PLoS One. 2015;10(2):e0117852) |
|                     |                        | AceIN-B3b                                         |            | AACATACATATGRTGYTTTACTA |                                 |
| AceIN-B3a           |                        | TCTTTGAAAYATACATATGRTG                            |            |                         |                                 |
| AceIN-FIPf          |                        | CTTGGCACTACYTTTATGTCACTAAARCTYCTCT<br>GGAAAGGTG   |            |                         |                                 |
| AceIN-FIPe          |                        | CTTGGTACTACYTTTATGTCACTAAARCTACTCT<br>GGAAAGGTG   |            |                         |                                 |
| AceIN-BIP           |                        | GGAYTATGGAAAACAGATGGCAGCCATGTTCT<br>AATCYTCATCCTG |            |                         |                                 |
| AceIN-LF            |                        | TCTTGTATTACTACTGCCCTT                             |            |                         |                                 |
| AceIN-LB            |                        | GTGMTGATTGTGTGGCARGTAG                            |            |                         |                                 |

|                        |          |                            |            |
|------------------------|----------|----------------------------|------------|
|                        | AceIN-F3 | CCMMTTTGGAAAGGACCAGC       |            |
| RT-qPCR assay of HIV-1 | HIV-1 F  | CAATTTTAAAAGAAAAGGGGGGATTG |            |
|                        | HIV-1 R  | TAAACCCGAAAATTTTGAATT      | This study |
|                        | HIV-1 P  | FAM-ACAGTGCAGGGGAAAG-MGB   |            |

The artificially introduced mutations are highlighted in red.

**Table S2. Detection rates of different HIV-1 serotypes by the conventional and the novel mismatch-tolerant RT-LAMP assays.**

| HIV-1 subtype | The conventional RT-LAMP |          |                    | The mismatch-tolerant RT-LAMP |          |                    | total |
|---------------|--------------------------|----------|--------------------|-------------------------------|----------|--------------------|-------|
|               | Positive                 | Negative | Detection rate (%) | Positive                      | Negative | Detection rate (%) |       |
| B             | 3                        | 1        | 75                 | 3                             | 1        | 75                 | 4     |
| C             | 1                        | 1        | 50                 | 1                             | 1        | 50                 | 2     |
| 01_AE         | 2                        | 4        | 33.3               | 4                             | 2        | 66.7               | 6     |
| 07_BC         | 0                        | 1        | 0                  | 0                             | 1        | 0                  | 1     |
| 08_BC         | 2                        | 1        | 66.7               | 3                             | 0        | 100                | 3     |
| 57_BC         | 1                        | 1        | 50                 | 2                             | 0        | 100                | 2     |
| 87_cpx        | 0                        | 2        | 0                  | 0                             | 2        | 0                  | 2     |
| 96_cpx        | 0                        | 1        | 0                  | 1                             | 0        | 100                | 1     |
| 62_BC         | 0                        | 1        | 0                  | 0                             | 1        | 0                  | 1     |
| 65_cpx        | 1                        | 0        | 100                | 1                             | 0        | 100                | 1     |
| URF           | 7                        | 14       | 33.3               | 14                            | 7        | 66.7               | 21    |
| Total         | 17                       | 27       | 38.6               | 29                            | 15       | 65.9               | 44    |

Note: The detection rate was calculated using the formula: (number of positive results/total number) × 100%.



|         | F3                        | F2                        | F1                              | B1                              | LB                           | B2                           |
|---------|---------------------------|---------------------------|---------------------------------|---------------------------------|------------------------------|------------------------------|
|         | CCAATTGGA AAGGACAGC (636) | AAACTACTC TGGAAAGTC (606) | AGTGATATA AAGTAGTA-C CAAG (502) | GGATTATGG- AAACAGATG GCAG (622) | GTGATGATG TGTGGCAGT AG (595) | CAGGATAGG ATTAGACAT GG (821) |
|         | ..C.G..... (373)          | C..... (505)              | ..C..... (435)                  | ..C..... (492)                  | ..C..... (400)               | .....A..... (520)            |
|         | ..C..... (149)            | C.....T..... (12)         | ..C..... (22)                   | ..C..... (40)                   | ..C..... (94)                | .....C..... (3)              |
|         | ..C.A..... (11)           | C.....G..... (12)         | ..C.....G..... (19)             | A..C..... (18)                  | ..C.....A..... (14)          | .....C..... (1)              |
| 07_BC   | ..T..... (4)              | C.....G..... (11)         | ..C.....G..... (11)             | ..C.....A..... (2)              | ..C.....G..... (14)          | .....A..... (1)              |
| (555)   | ..CW..... (3)             | C.....A..... (4)          | ..A.....G..... (10)             | ..Y..... (2)                    | ..... (12)                   | ..... (1)                    |
|         | ..C.G.....C..... (2)      | C.....C..... (2)          | ..C.....G..... (6)              | A..H..... (1)                   | ..C.....A..... (10)          | ..... (1)                    |
|         | ..C.....G..... (2)        | C.....C..... (2)          | ..C.....G.....T..... (5)        | ..C.....A..... (3)              | ..C.....A..... (3)           | ..... (1)                    |
|         | ..AC.G..... (2)           | C.....G.....G..... (2)    | ..C.....C.....G..... (5)        | ..C.....A..... (3)              | ..C.....A..... (3)           | ..... (1)                    |
|         | ..OC..... (2)             | C.....C..... (2)          | ..C.....C.....C..... (5)        | ..C.....A..... (2)              | ..C.....A..... (2)           | ..... (1)                    |
|         | ..C.GC..... (1)           | C.....G..... (1)          | ..A.....G..... (2)              | ..C..... (2)                    | ..C..... (2)                 | ..... (1)                    |
|         | ..C.G.....C..... (1)      | C.....G.....C..... (1)    | ..C.....G.....A..... (2)        | ..C.....A..... (2)              | ..C.....A..... (2)           | ..... (1)                    |
|         | ..C.GG..... (1)           | C.....G.....C..... (1)    | ..C.....A..... (3)              | ..C.....A..... (2)              | ..C.....A..... (2)           | ..... (1)                    |
|         | ..C.G.....G..... (1)      | ..... (1)                 | ..C.....G.....C..... (3)        | ..C.....A..... (2)              | ..C.....A..... (2)           | ..... (1)                    |
|         | ..GG..... (1)             | ..... (1)                 | ..C.....T.....G..... (3)        | ..T..... (1)                    | ..T..... (1)                 | ..... (1)                    |
|         | ..C.K..... (1)            | ..... (1)                 | ..C.....G.....G..... (3)        | ..C..... (1)                    | ..C..... (1)                 | ..... (1)                    |
|         | ..... (1)                 | ..... (1)                 | ..G.....C.....G..... (2)        | ..C.....R..... (1)              | ..C.....R..... (1)           | ..... (1)                    |
|         | ..... (1)                 | ..... (1)                 | ..A.....C.....G.....A..... (2)  | ..C.....A..... (1)              | ..C.....A..... (1)           | ..... (1)                    |
|         | ..... (1)                 | ..... (1)                 | ..A.....A.....G..... (2)        | ..... (2)                       | ..... (2)                    | ..... (1)                    |
|         | ..... (1)                 | ..... (1)                 | ..A.....G.....G..... (2)        | ..C.....G..... (1)              | ..C.....G..... (1)           | ..... (1)                    |
|         | ..... (1)                 | ..... (1)                 | ..OC.....G..... (2)             | ..C.....G.....A..... (1)        | ..C.....G.....A..... (1)     | ..... (1)                    |
|         | ..... (1)                 | ..... (1)                 | ..C.....C.....GA..... (1)       | ..C.....G.....T..... (1)        | ..C.....G.....T..... (1)     | ..... (1)                    |
|         | ..... (1)                 | ..... (1)                 | ..C.....G.....K..... (1)        | ..... (1)                       | ..... (1)                    | ..... (1)                    |
|         | ..... (1)                 | ..... (1)                 | ..C.....G.....H..... (1)        | ..... (1)                       | ..... (1)                    | ..... (1)                    |
|         | ..... (1)                 | ..... (1)                 | .....A..... (1)                 | ..... (1)                       | ..... (1)                    | ..... (1)                    |
| 08_BC   | ..... (92)                | C..... (83)               | .....C.....G..... (75)          | ..C..... (88)                   | ..C..... (83)                | .....A..... (80)             |
| (98)    | ..C.G..... (2)            | C.....G..... (9)          | ..C.....C.....G..... (6)        | A..C..... (3)                   | ..C.....A..... (3)           | ..... (3)                    |
|         | ..C.A..... (1)            | C.....G..... (3)          | ..C.....G..... (5)              | ..C..... (2)                    | ..C.....A..... (4)           | .....G..... (4)              |
|         | ..T..... (1)              | C.....T..... (1)          | ..C.....G..... (4)              | ..C.....C..... (2)              | ..C.....A..... (2)           | .....A..... (2)              |
|         | ..... (1)                 | C.....T..... (1)          | ..C.....G.....C..... (3)        | ..C.....C.....C..... (1)        | ..C..... (2)                 | .....C..... (2)              |
|         | ..... (1)                 | C.....T..... (1)          | ..C.....GA..... (1)             | ..C.....A..... (1)              | ..C.....G..... (2)           | .....A.....A..... (1)        |
|         | ..... (1)                 | ..... (1)                 | ..C.....G.....G..... (1)        | ..C..... (2)                    | ..C.....A..... (2)           | .....C..... (1)              |
|         | ..... (1)                 | ..... (1)                 | ..C.....G.....G..... (1)        | ..C.....A..... (1)              | ..C.....A..... (1)           | ..... (1)                    |
|         | ..... (1)                 | ..... (1)                 | ..A.....G.....G..... (1)        | ..G.....A..... (1)              | ..G.....A..... (1)           | ..... (1)                    |
|         | ..... (1)                 | ..... (1)                 | ..C.....G.....T..... (1)        | ..... (1)                       | ..... (1)                    | ..... (1)                    |
| C       | ..C..... (22)             | C..... (18)               | .....C.....G..... (18)          | ..C..... (22)                   | ..C..... (18)                | .....A..... (18)             |
| (25)    | ..T..... (1)              | C.....G..... (2)          | ..G.....G..... (1)              | ..... (3)                       | ..C.....A..... (3)           | ..... (6)                    |
|         | ..... (1)                 | C.....T..... (2)          | ..C.....G.....A..... (1)        | ..... (2)                       | ..C.....A..... (2)           | .....G..... (1)              |
|         | ..... (1)                 | C.....T..... (1)          | ..C.....G.....G..... (1)        | ..... (1)                       | ..C.....A..... (1)           | ..... (1)                    |
|         | ..... (1)                 | C.....T..... (1)          | ..A.....G..... (1)              | ..... (1)                       | ..C.....A..... (1)           | ..... (1)                    |
|         | ..... (1)                 | C.....G.....C..... (1)    | ..C.....G..... (1)              | ..... (1)                       | ..C.....A..... (1)           | ..... (1)                    |
|         | ..... (1)                 | ..... (1)                 | ..C.....G.....C..... (1)        | ..... (1)                       | ..... (1)                    | ..... (1)                    |
| 55_01B  | ..... (8)                 | ..... (5)                 | .....C.....G..... (8)           | ..... (8)                       | ..... (8)                    | ..... (8)                    |
| (8)     | ..... (2)                 | ..T..... (2)              | ..... (2)                       | ..... (2)                       | ..... (2)                    | ..... (2)                    |
|         | ..T.R..... (1)            | ..... (1)                 | ..... (1)                       | ..... (1)                       | ..... (1)                    | ..... (1)                    |
| 57_BC   | ..... (7)                 | C..... (6)                | .....C.....G..... (3)           | ..C..... (6)                    | ..C..... (5)                 | .....A..... (6)              |
| (7)     | ..... (1)                 | C.....G..... (1)          | ..C.....G.....C..... (2)        | A..C..... (1)                   | ..... (2)                    | .....A.....C..... (1)        |
|         | ..... (1)                 | ..... (1)                 | ..C..... (1)                    | ..... (1)                       | ..... (1)                    | ..... (1)                    |
|         | ..... (1)                 | ..... (1)                 | ..G..... (1)                    | ..... (1)                       | ..... (1)                    | ..... (1)                    |
| 59_01B  | ..... (9)                 | ..... (9)                 | ..... (8)                       | ..... (9)                       | ..... (9)                    | ..... (9)                    |
| (9)     | ..... (1)                 | ..... (1)                 | A..... (1)                      | ..... (1)                       | ..... (1)                    | ..... (1)                    |
| 61_BC   | ..... (4)                 | C..... (4)                | .....C.....G..... (4)           | ..... (3)                       | ..C..... (4)                 | .....A..... (2)              |
| (4)     | ..... (1)                 | ..... (1)                 | ..... (5)                       | ..... (1)                       | ..... (1)                    | .....A.....A..... (2)        |
| 65_cpx  | ..... (7)                 | ..... (7)                 | .....C..... (1)                 | ..... (7)                       | ..... (7)                    | .....A..... (7)              |
| (7)     | ..... (1)                 | ..... (1)                 | ..G..... (1)                    | ..... (1)                       | ..... (1)                    | ..... (1)                    |
| 67_01B  | ..... (2)                 | ..... (2)                 | ..... (2)                       | ..... (2)                       | ..... (2)                    | ..... (2)                    |
| (2)     | ..... (4)                 | ..... (4)                 | ..... (4)                       | ..... (4)                       | ..... (4)                    | ..... (4)                    |
| 68_01B  | ..... (4)                 | ..... (4)                 | ..... (4)                       | ..... (4)                       | ..... (4)                    | ..... (4)                    |
| (4)     | ..C..... (8)              | C..... (6)                | .....C.....G..... (8)           | ..C..... (4)                    | ..C..... (7)                 | .....A..... (7)              |
| 69_BC   | ..C.G..... (1)            | C.....T..... (2)          | ..C.....G.....Y..... (1)        | ..C..... (4)                    | ..C.....A..... (2)           | .....A..... (2)              |
| (9)     | ..... (1)                 | C.....G..... (1)          | ..... (1)                       | A..C..... (1)                   | ..H..... (1)                 | ..... (1)                    |
| 78_cpx  | ..... (2)                 | ..... (2)                 | ..... (3)                       | ..... (3)                       | ..... (3)                    | ..... (3)                    |
| (3)     | ..C..... (1)              | .....T..... (1)           | ..... (1)                       | ..... (1)                       | ..... (1)                    | ..... (1)                    |
| 79_0107 | ..... (3)                 | ..... (2)                 | .....C..... (3)                 | ..... (3)                       | ..... (3)                    | ..... (3)                    |
| (3)     | ..... (1)                 | .....T..... (1)           | ..... (1)                       | ..... (1)                       | ..... (1)                    | ..... (1)                    |
| 80_0107 | ..... (2)                 | ..... (2)                 | ..C..... (2)                    | ..A..... (3)                    | ..C..... (2)                 | ..... (3)                    |
| (3)     | ..C..... (1)              | ..G..... (1)              | ..C.....T..... (1)              | ..... (1)                       | CC.C..... (1)                | ..... (1)                    |
| 85_BC   | ..... (8)                 | C..... (7)                | .....C.....G..... (9)           | ..... (8)                       | ..C..... (8)                 | .....A..... (8)              |
| (9)     | ..C.A..... (1)            | C.....T..... (1)          | ..... (1)                       | ..C.....G..... (1)              | ..C.....A..... (1)           | ..... (1)                    |
|         | ..... (1)                 | C.....G..... (1)          | ..... (1)                       | ..... (1)                       | ..... (1)                    | ..... (1)                    |
| 86_BC   | ..T..... (3)              | C..... (3)                | .....C.....G..... (3)           | ..... (2)                       | ..C..... (3)                 | .....A..... (2)              |
| (3)     | ..... (2)                 | ..... (1)                 | ..... (2)                       | ..... (1)                       | ..G.....A..... (1)           | ..... (1)                    |
| 87_cpx  | ..... (3)                 | ..... (2)                 | ..... (2)                       | ..... (3)                       | ..... (3)                    | .....A..... (3)              |
| (3)     | ..G..... (1)              | .....A..... (1)           | .....A..... (1)                 | ..... (1)                       | ..... (1)                    | ..... (1)                    |
| 88_BC   | ..... (3)                 | C..... (2)                | .....C.....G..... (3)           | ..... (2)                       | ..C..... (3)                 | .....A..... (2)              |
| (3)     | ..C..... (1)              | C.K..... (1)              | ..... (1)                       | ..... (1)                       | .....A.....H..... (1)        | ..... (1)                    |
| 96_cpx  | ..... (3)                 | ..... (3)                 | ..... (2)                       | ..... (2)                       | ..... (2)                    | ..... (2)                    |
| (3)     | ..... (4)                 | ..... (4)                 | ..AC.A.....G.....G..... (3)     | ..T..... (1)                    | .....T.....A..... (1)        | .....A..... (1)              |
| G       | ..C..... (1)              | ..C..... (1)              | ..AC.A.....G..... (1)           | ..... (2)                       | ..G.....A..... (2)           | .....A.....G..... (1)        |
| (5)     | ..... (1)                 | ..... (1)                 | ..AC.A.....G..... (1)           | ..... (1)                       | ..... (1)                    | ..... (1)                    |

**Figure S1.** Locations (A) and sequence alignments (B and C) of all available HIV-1 strains. A total of 661 01\_AE, 322 B, 555 07\_BC, 98 08\_BC, 25 C, 8 55\_01B, 7 57\_BC, 9 59\_01B, 4 61\_BC, 7 65\_cpx, 2 67\_01B, 4 68\_01B, 9 69\_BC, 3 78\_cpx, 3 79\_0107, 3 80\_0107, 9 85\_BC, 3 86\_BC, 3 87\_cpx, 3 88\_BC, 3 96\_cpx, and 5 G HIV-1 sequences were downloaded from HIV Database (<https://www.hiv.lanl.gov/content/sequence/HIV/mainpage.html>) on April 10, 2019. The number of identical sequences is shown in parenthesis following each unique sequence. Dot, identity with the topmost sequence; Dash, deletion.

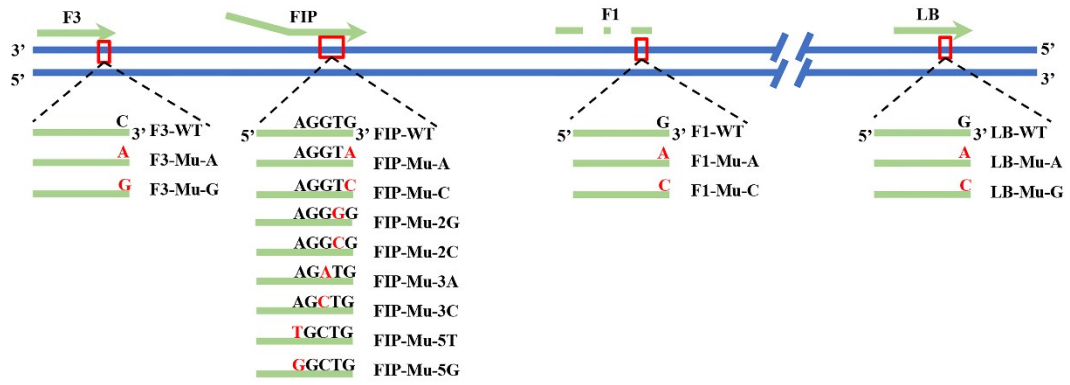

**Figure S2.** Schematic diagram of different HIV mutation templates. WT, wild-type; Mu, mutant.

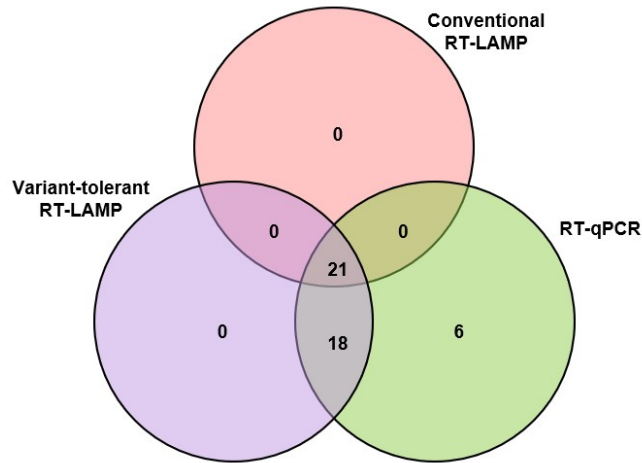

**Figure S3.** Numbers of HIV-1 positive samples detected by three different assays.

| Primer        | F3                                        | F2                                  | LF                        | F1                       | B1                           | LB                               | B2                               | B3        |
|---------------|-------------------------------------------|-------------------------------------|---------------------------|--------------------------|------------------------------|----------------------------------|----------------------------------|-----------|
| 4838 (01_AE)  | CCMMTTTGGGA AAGGACCAGCAAARCTYCTC          | TGGAAAGGAG AAGGGGCAGT AGTAATACAA GA | AGTGACATAA ARGTAGTGCC AAG | GGATTATGGA AACAGATGG CAG | GTGTMGATTG TGTGGCARGT AG     | CAGGATGARG ATTAGAACAT GG         | TAGTAAARCA YCATATGTAT RTCTCAAAGA |           |
| 4780 (01_AE)  | A. AA..... C. A. A. .... G. . T. ....     | ..... G. . T. ....                  | ..... T. .... A. ....     | ..... C. .... G. . .     | ..... A. . G. .... G. . .    | ..... G. ....                    | ..... AT. T. .... G. ....        |           |
| 4774 (57_BC)  | .. AC..... . G. C. T . . G. . T. ....     | ..... G. ....                       | ..... G. ....             | ..... G. G. A. ....      | ..... C. .... G. . .         | ..... G. .... A. .... AG. T. . . | ..... G. T. .... A. .... G. .    |           |
| 4799 (96_cpx) | .. TA. C. .... C. A. A. .... G. . T. .... | ..... G. ....                       | ..... G. G. A. ....       | ..... G. G. A. ....      | ..... C. .... G. . .         | ..... A. .... AG. T. . .         | ..... A. C. .... G. T. ....      |           |
| 4663 (B)      | A. AA..... C. A. A. .... G. A. T. ....    | ..... G. ....                       | ..... G. ....             | ..... G. ....            | ..... A. .... G. . .         | ..... G. ....                    | ..... A. T. .... G. ....         |           |
| 4635 (08_BC)  | .. CA..... C. A. A. .... G. A. T. ....    | ..... G. ....                       | ..... G. ....             | ..... G. ....            | ..... C. .... A. ....        | ..... A. .... A. ....            | ..... A. C. .... G. ....         |           |
| 4624 (URF)    | .. CA..... C. A. A. .... G. A. T. ....    | ..... G. ....                       | ..... G. ....             | ..... G. ....            | ..... C. .... G. . .         | ..... A. .... A. ....            | ..... A. C. .... A. T. ....      |           |
| 4651 (URF)    | .. AA..... A. A. .... G. . T. ....        | ..... G. ....                       | ..... G. ....             | ..... G. ....            | ..... A. .... G. . .         | ..... G. ....                    | ..... A. T. .... G. ....         |           |
| 4662 (URF)    | .. AA..... A. A. .... G. . T. ....        | ..... G. ....                       | ..... T. ....             | ..... A. ....            | ..... A. .... G. . .         | ..... G. ....                    | ..... A. T. .... G. ....         |           |
| 4665 (URF)    | A. AA..... AT. G. .... G. . T. ....       | ..... G. ....                       | ..... T. ....             | ..... A. ....            | ..... C. .... T. .... G. . . | ..... G. ....                    | ..... A. T. .... G. .... G. .    |           |
| 4808 (URF)    | A. AA..... C. A. A. .... G. A. T. ....    | ..... G. ....                       | ..... T. ....             | ..... A. ....            | ..... A. .... G. . .         | ..... G. ....                    | ..... A. T. C. . C. A. ....      |           |
| 4825 (URF)    | .. CA..... C. A. A. .... G. A. T. ....    | ..... G. ....                       | ..... T. ....             | ..... A. ....            | ..... A. G. .... G. . .      | ..... G. ....                    | ..... A. C. .... G. T. ....      |           |
| 4867 (URF)    | A. AA..... C. A. A. .... G. A. T. ....    | ..... G. ....                       | ..... G. ....             | ..... A. ....            | ..... C. .... G. . .         | ..... A. ....                    | ..... A. C. .... A. T. ....      |           |
|               | ▲ ▲                                       | ▲ ▲ ▲ ▲                             | ▲ ▲                       | ▲ ▲ ▲                    | ▲                            | ▲                                | ▲ ▲ ▲                            | ▲ ▲ ▲ ▲ ▲ |

**Figure S4.** Alignment analysis of primer sequences for clinical samples. A total of 13 samples were analyzed, including seven cases of URF (marked in red), two cases of 01\_AE, one case each for 57\_BC, 96\_cpx, B, and 08\_BC, and the black triangle indicates the mutation site. Dot, identity with the topmost sequence; Dash, deletion.

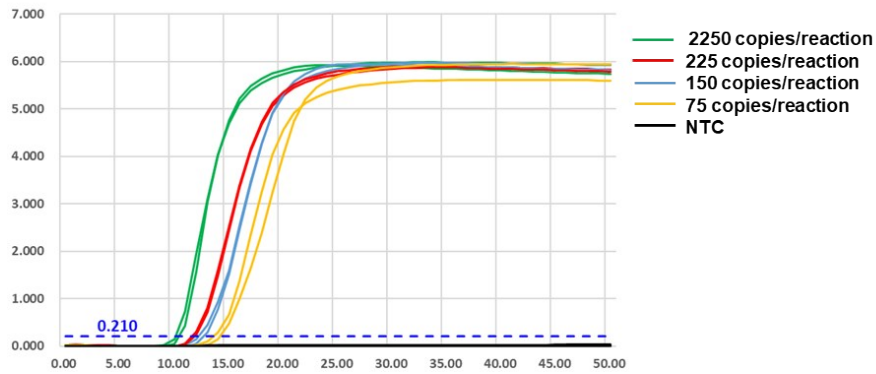

**Figure S5.** Mismatch-tolerant RT-LAMP detection by rapidly magnetic bead-based RNA extraction. The threshold is determined as 3 standard deviation from the background (0.210, dotted blue line).

NTC: no template control.

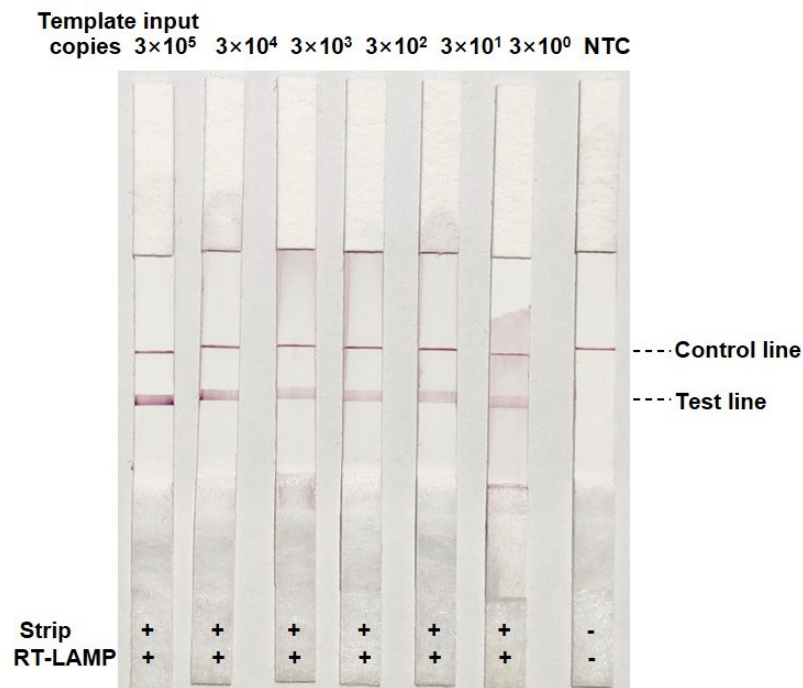

**Figure S6.** Lateral flow strip test of the sensitivity of RT-LAMP products. A single red line (control line) indicates a negative result, whilst two single red lines (control and test lines) indicate a positive result. ‘+’: positive results; ‘-’: negative results; Pos: positive control; NTC: no template control; Control line: represents the control result; Test line: represents the test result.



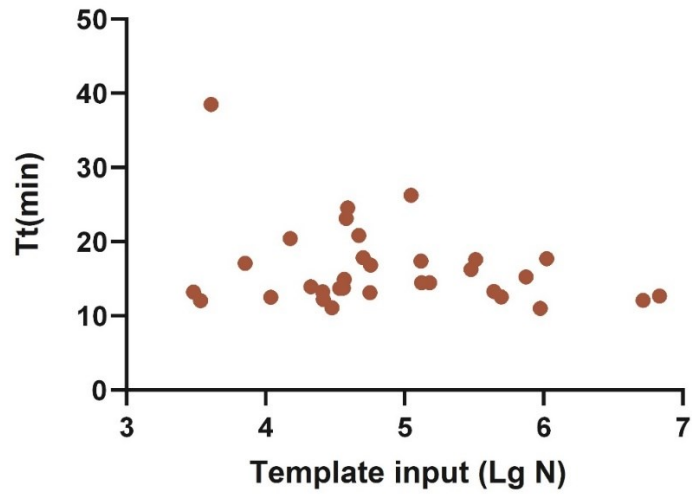

**Figure S7.** Correlation between the number of copies measured in 32 positive clinical samples and the novel RT-LAMP detection time. Tt: time threshold.

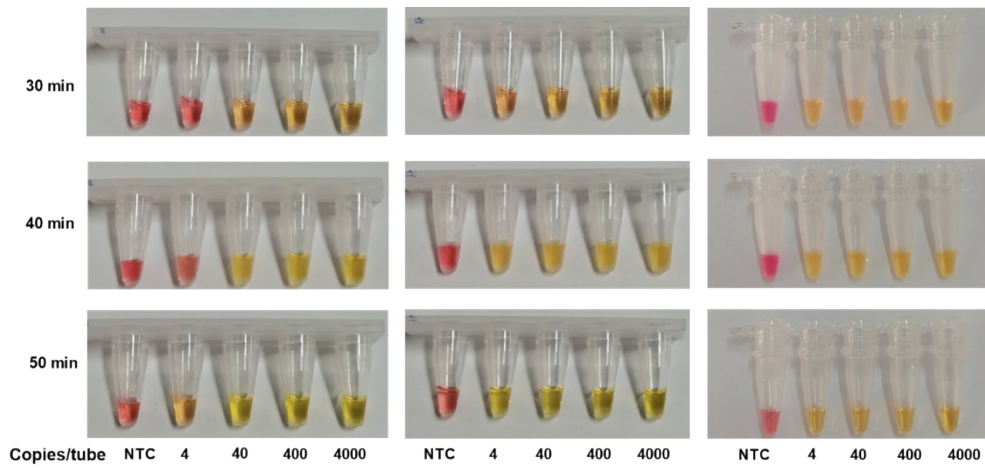

**Figure S8.** Visual detection of HIV-1 using the novel mismatch-tolerant RT-LAMP assays with

cresol red. The color change from burgundy to orange or yellow is considered as positive. NTC: no template control.
